# Supplementary material for: Clinical Pharmacokinetics and Dose Recommendations for Posaconazole in Infants and Children
Source: PubMed Central journal article supplement (PMC6326087; doi:10.1007/s40262-018-0658-1), 2018-04-20
Supplement: 40262_2018_658_MOESM1_ESM.pdf [file 40262_2018_658_MOESM1_ESM.pdf]

# SUPPLEMENTARY MATERIAL: Clinical Pharmacokinetics and Dose Recommendations for Posaconazole in Infants and Children

## 1 NONMEM model file with values set to final estimates

```
$PROBLEM      Posaconazole Model
$INPUT        IDORIG ID AGE TIME TAD AMT EVID DV LNDV CMT FORM FREQ II
              SS JAC SEX WT MISSLVL MISSDOST MISSDOS MACROLIDES
              ECHINOCANDINS TERB PI CIC FK MMF RIF CBZ PHT H2 PPI ART
              VAL VERAPQUIN MISSFREQ MISSFORM MISSWT DIARRHOEA
              PROPHYLAXIS BLQ BSA LOQ SUSP NSAMP ONESAMP
$DATA         posaconazole_GOSH_data_171120.csv IGNORE=I
$SUBROUTINE   ADVAN2 TRANS1
$PK

TVCL          = THETA(1) * (WT/70)**0.75
CL            = TVCL * EXP(ETA(1))

TVVC          = THETA(2) * (WT/70)
VC            = TVVC

IF(FORM==1) TVKA = THETA(3) * (WT/70)**(-0.25)
IF(FORM==2) TVKA = THETA(4) * (WT/70)**(-0.25)
KA            = TVKA
;Diarrhoea effect on susp only
IF(DIARRHOEA==1) F1DIARRHOEA = 1 ; No diarrhoea
IF(DIARRHOEA==2) F1DIARRHOEA = ( 1 + THETA(6))
IF(FORM==2) F1DIARRHOEA = 1

;PPI effect on susp only
IF(PPI==2) F1PPI = 1 ; Not on PPI
IF(PPI==1) F1PPI = ( 1 + THETA(7))
IF(FORM==2) F1PPI = 1

;Dose effect on F
DOSF = 0
D50 = 0
IF(FORM==1) D50 = THETA(5)
IF(AMT>0) DOSE = AMT
DOSEM2 = DOSE / BSA
IF(FORM==1) DOSF = (DOSEM2 / (DOSEM2 + D50))
TVF1      = (1 - DOSF) * F1DIARRHOEA * F1PPI

F1        = TVF1

K          = CL/VC
S2        = VC
```

```

$ERROR
  CP   = A(2)/S2
  IPRED = CP
  PE   = EPS(1) ; proportional error
  AE   = EPS(2) ; additive error
  Y    = IPRED*(1 + PE) + AE

  PROP = SQRT(SIGMA(1,1))*IPRED
  ADD  = SQRT(SIGMA(2,2))
  SD   = SQRT(PROP*PROP + ADD*ADD) ; Standard deviation
  IRES = DV-IPRED
  IWRES = IRES/SD
;
$THETA (0,14.9512) ; CL
$THETA (0,201.68) ; VC from Petitcollin et al
$THETA 0.197 FIX ; Ka susp from Ezzet et al
$THETA 0.588 FIX ; Ka tab from Petitcollin et al
$THETA (0,99.0449) ; D50
$THETA (-1,-0.332839,5) ; F1DIARRHOEA1
$THETA (-1,-0.416551,5) ; F1PPI1
;
$OMEGA 0.400179 ; CL
;
$SIGMA 0.223604
$SIGMA 0.0162301
;;;
$ESTIMATION MAXEVAL=9999 PRINT=5 METHOD=COND INTERACTION
$COVARIANCE PRINT=E
$TABLE ID TIME EVID IPRED TAD IWRES CWRES NPDE IPRED NOPRINT
  ONEHEADER FILE=sdtab6
$TABLE ID CL VC KA F1 ETA1 NOPRINT ONEHEADER NOAPPEND FILE=patab6
$TABLE ID JAC SEX WT MISLVL MISSDOST MISSDOS MACROLIDES
  ECHINOCANDINS TERB PI CIC FK MMF RIF CBZ PHT H2 PPI ART
  VAL VERAPQUIN MISSFREQ MISSFORM MISSWT DIARRHOEA
  PROPHYLAXIS BLQ NSAMP ONESAMP SUSP NOPRINT ONEHEADER
  NOAPPEND FILE=catab6
$TABLE ID WT AGE BSA NOPRINT ONEHEADER NOAPPEND FILE=cotab6

```
